# Supplementary material
Source: publisher figshare collection journal article supplement (https://acs.figshare.com/ndownloader/files/4735903)

# Reactions of Indene and Indoles with Platinum Methyl Cations: Indene C-H Activation, Indole $\pi$ vs. Nitrogen Lone-Pair Coordination

Travis J. Williams, Jay A. Labinger,\* and John E. Bercaw\*

- I. Crossover Experiment between **9** and 1-methylindole.
- II. Conversion of **6a** to **8a** at high  $[H^+]$ .
- III. About H/D Exchange and Methane Isotopologs Formed in the Conversion of **3** to **4**.
- IV. Selected  $^1H$  NMR spectra for new compounds.

## I. Crossover Experiment between **9** and 1-methylindole.

A detailed procedure for this experiment is presented in the main text; figure S1 shows kinetic data collected as described.

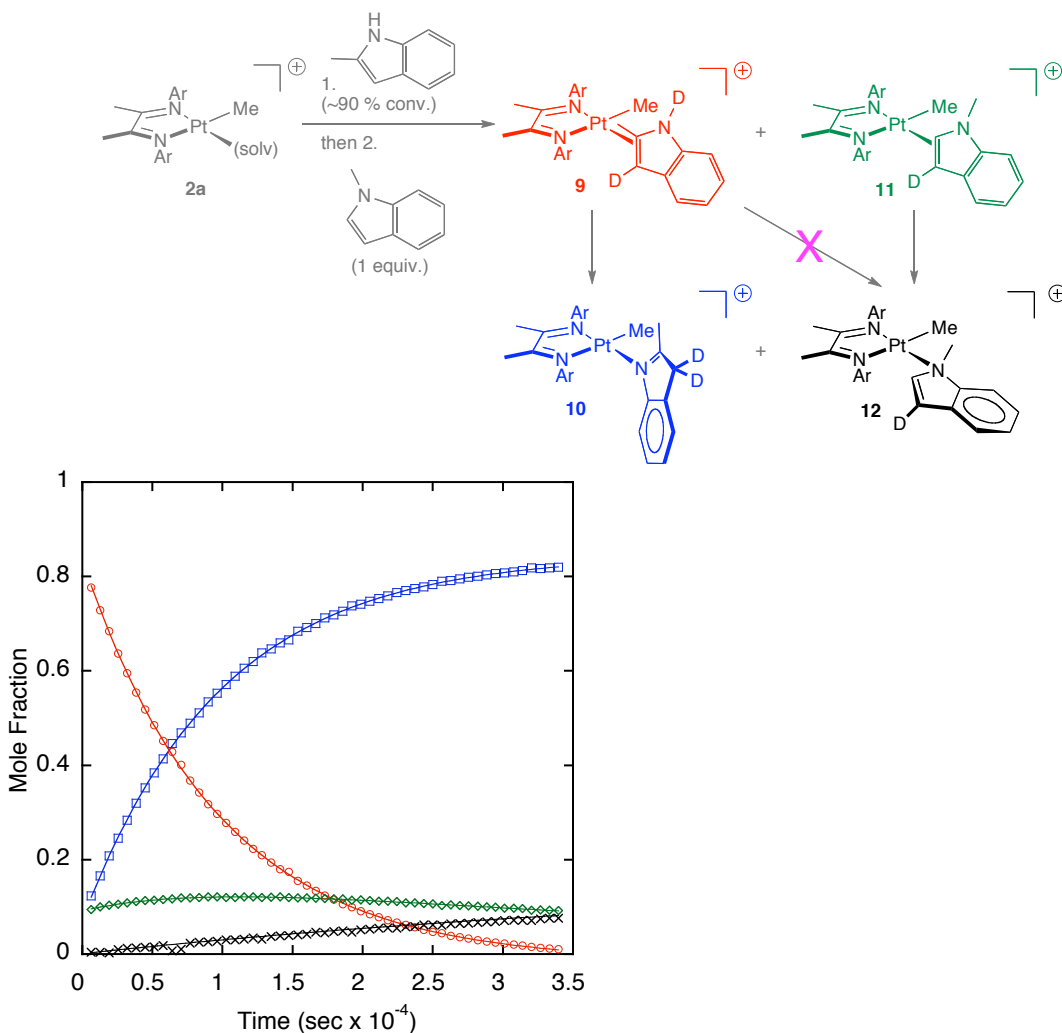

Figure S1. Conversion of **9** to **10** in the presence of 1-methylindole.

## II. Conversion of **6a** to **8a** at high $[H^+]$ .

A detailed procedure for this experiment is presented in the main text; figure S2 illustrates a sample  $^1H$  spectrum (Pt- $CH_3$  region,  $1 \times 10^4$  sec after mixing) containing **2a**, **6a**, **8a**, and the intermediate structure postulated to be **7a**.

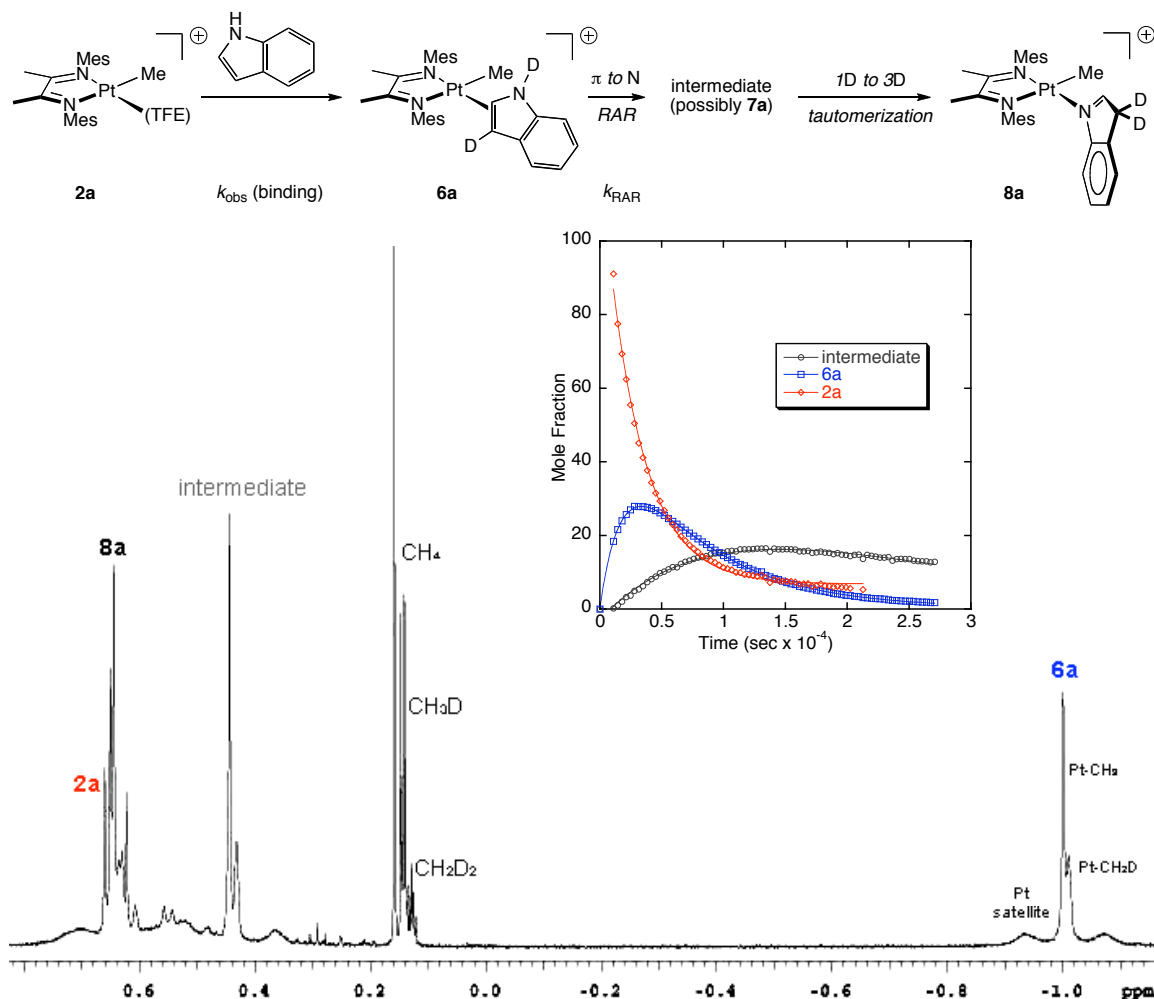

Figure S2. Conversion of **2a** in the presence of 5 equiv. each of  $BF_3$  and indole. Bottom:  $^1H$  NMR spectrum (500 MHz, TFE- $d_3$ ) for Pt- $CH_3$  region at  $t = 1 \times 10^4$  sec. Inset: kinetic data for this reaction.

### III. About H/D Exchange and Methane Isotopologs Formed in the Conversion of **3** to **4**.

$^2\text{H}$  NMR spectra of **4a** and **4a-d<sub>2</sub>** were recorded to track  $^2\text{H}$  incorporation in these compounds as described in the main text. Data are shown in figure S3.

Figure S3.  $^2\text{H}$  incorporation in the conversion of **3a** to **4a**

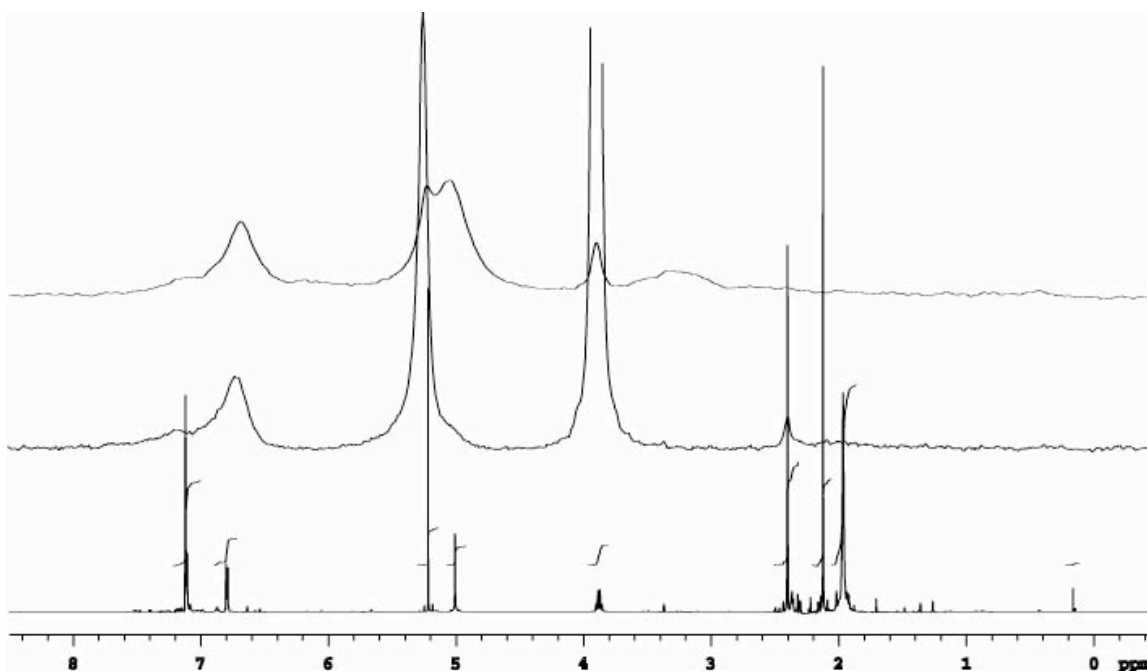

Bottom:  $^1\text{H}$  spectrum of **4a** (600 MHz). Middle:  $^2\text{H}$  spectrum of **4a** (76.7 MHz). Solvent has been removed *en vacuo* and replaced with  $\text{THF-}h_3$ . Top:  $^2\text{H}$  spectrum of **4a-d<sub>2</sub>** (76.7 MHz). Solvent has been removed *en vacuo* and replaced with  $\text{THF-}h_3$  twice. (The broad signal at  $\sim 3.3$  is a decomposition product that appeared after the second cycle of solvent replacement.)

#### IV. Selected $^1\text{H}$ NMR spectra for new compounds

Indene complex **3a**:

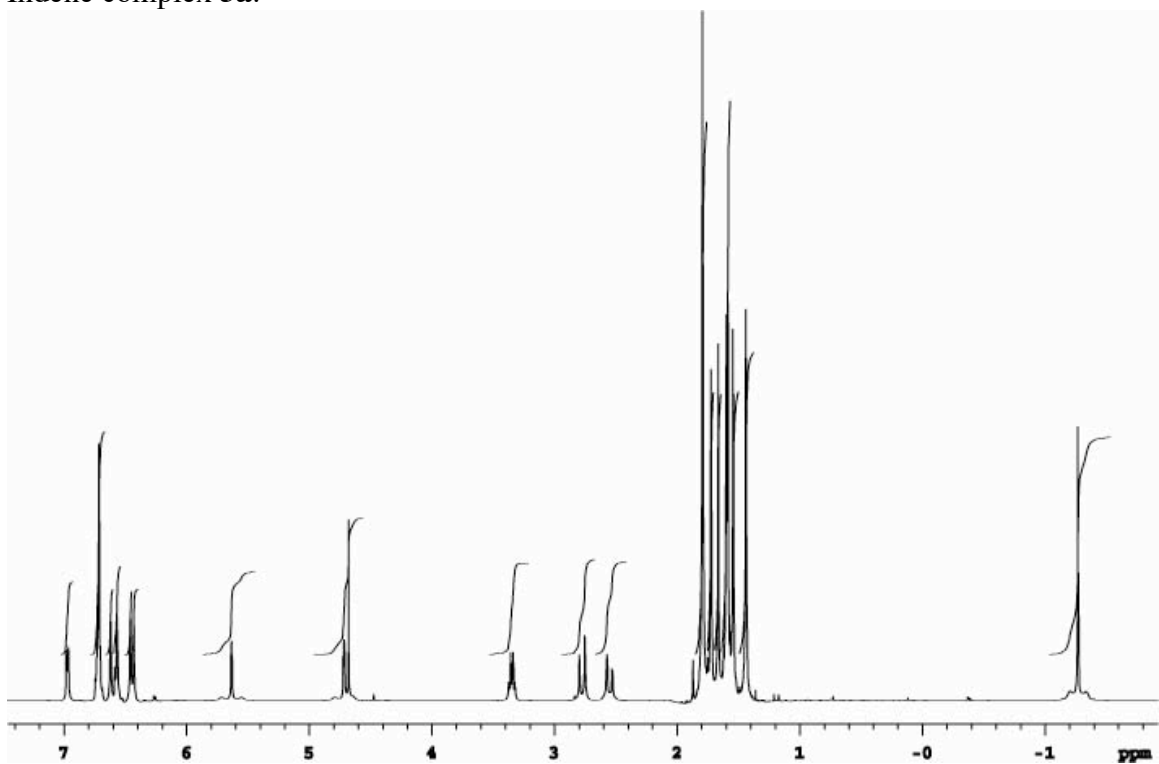

Indene complex **3a- $d_3$**

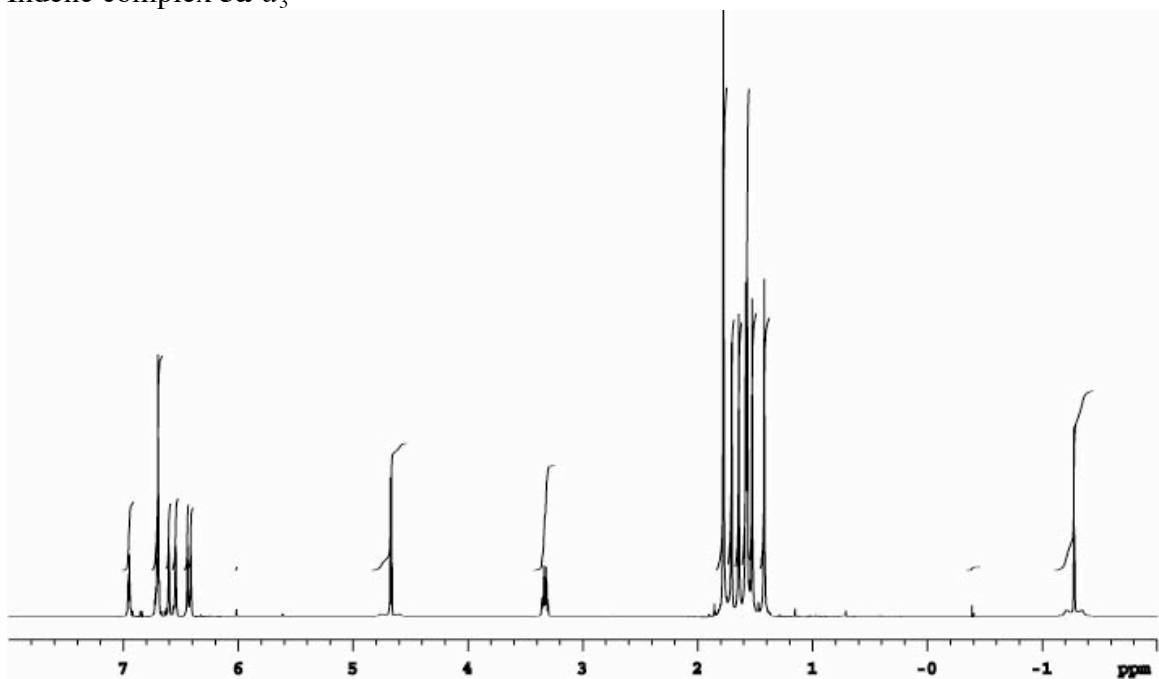

Indenyl complex **4a**: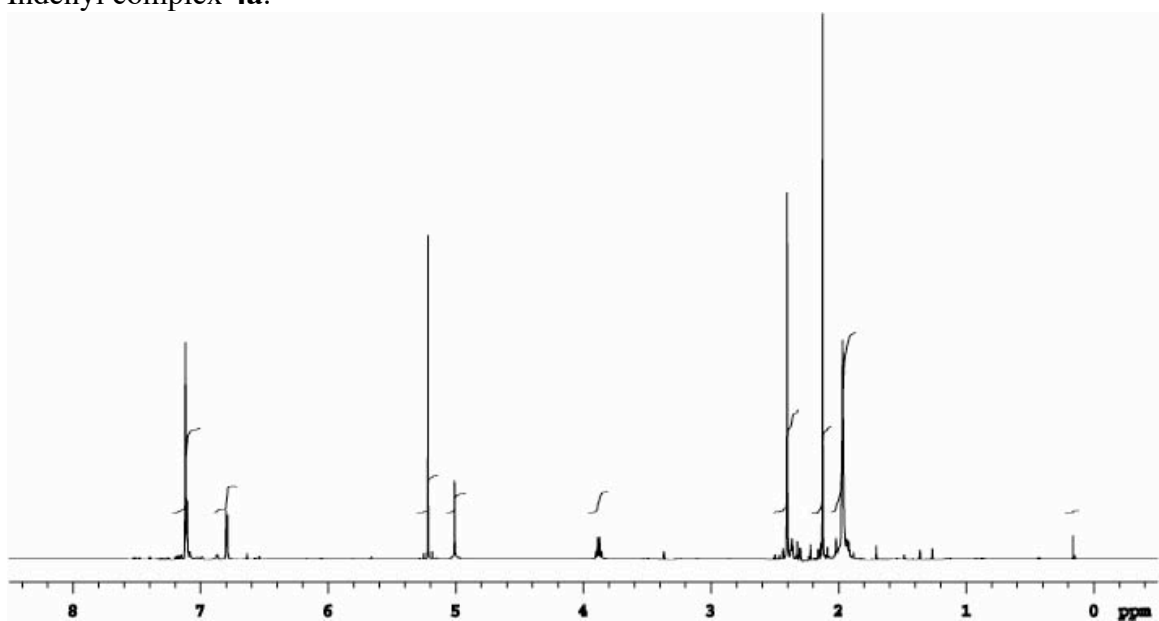Indenyl complex **4a-d<sub>2</sub>**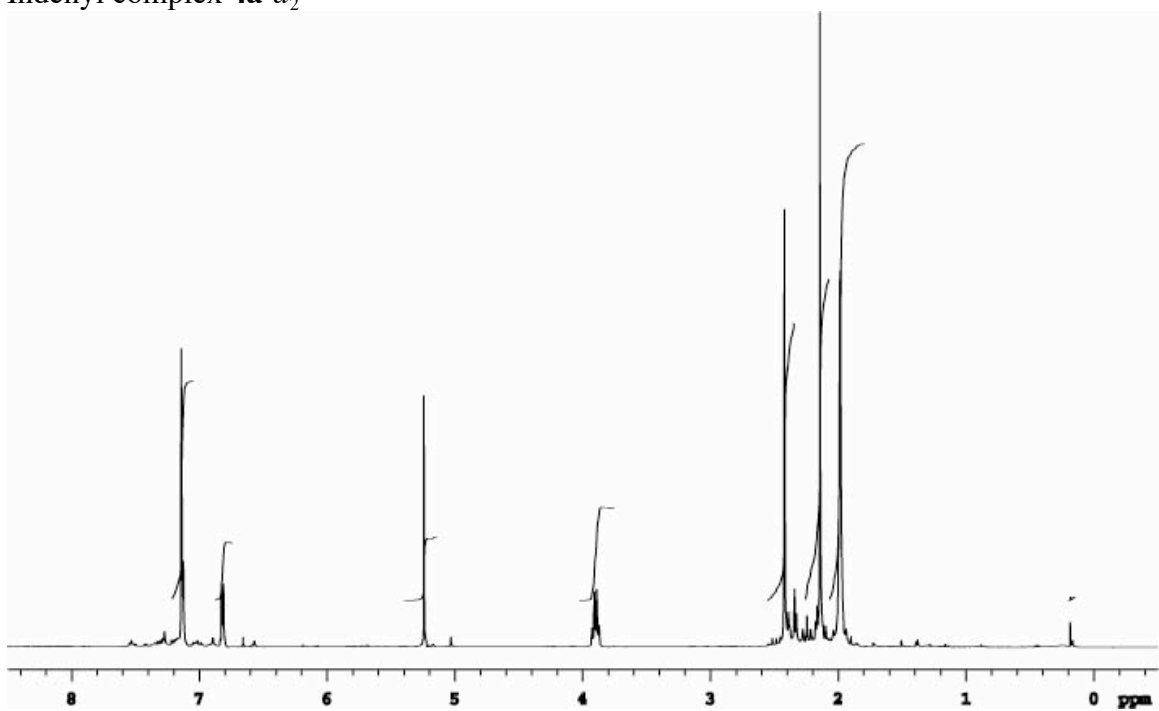

Indole complex **8a**: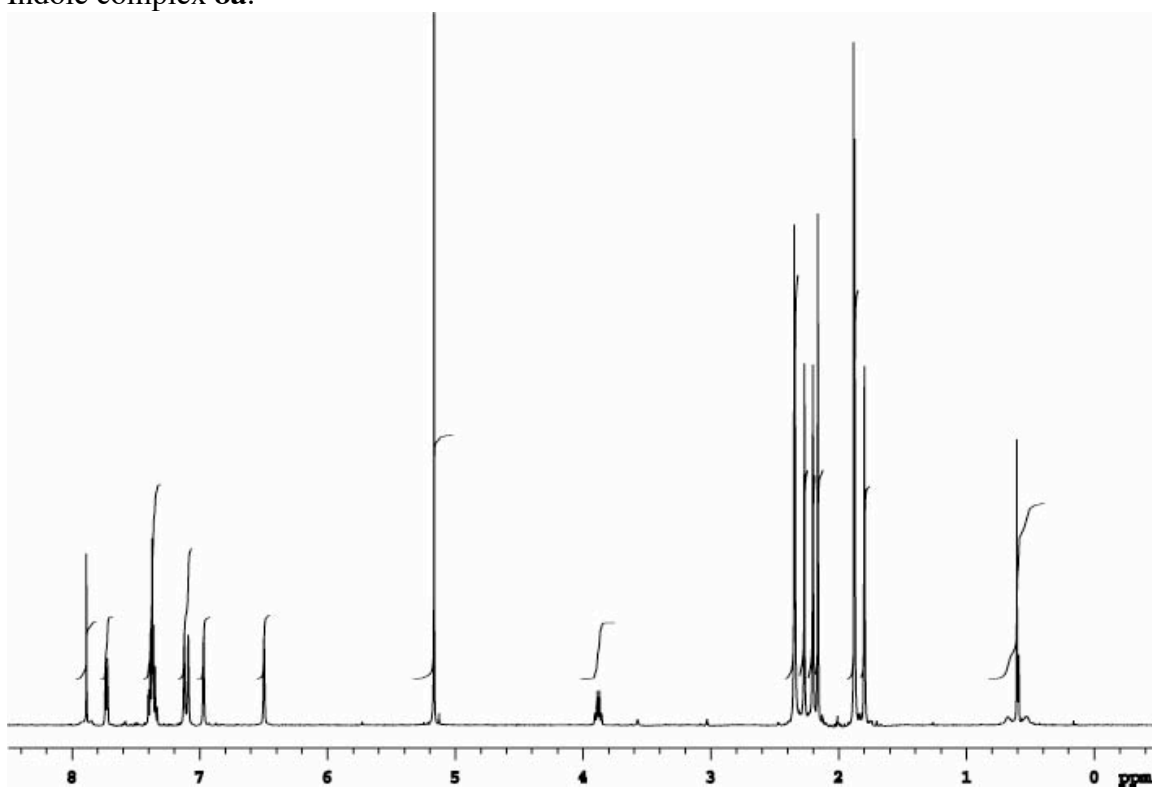Indole complex **8b**: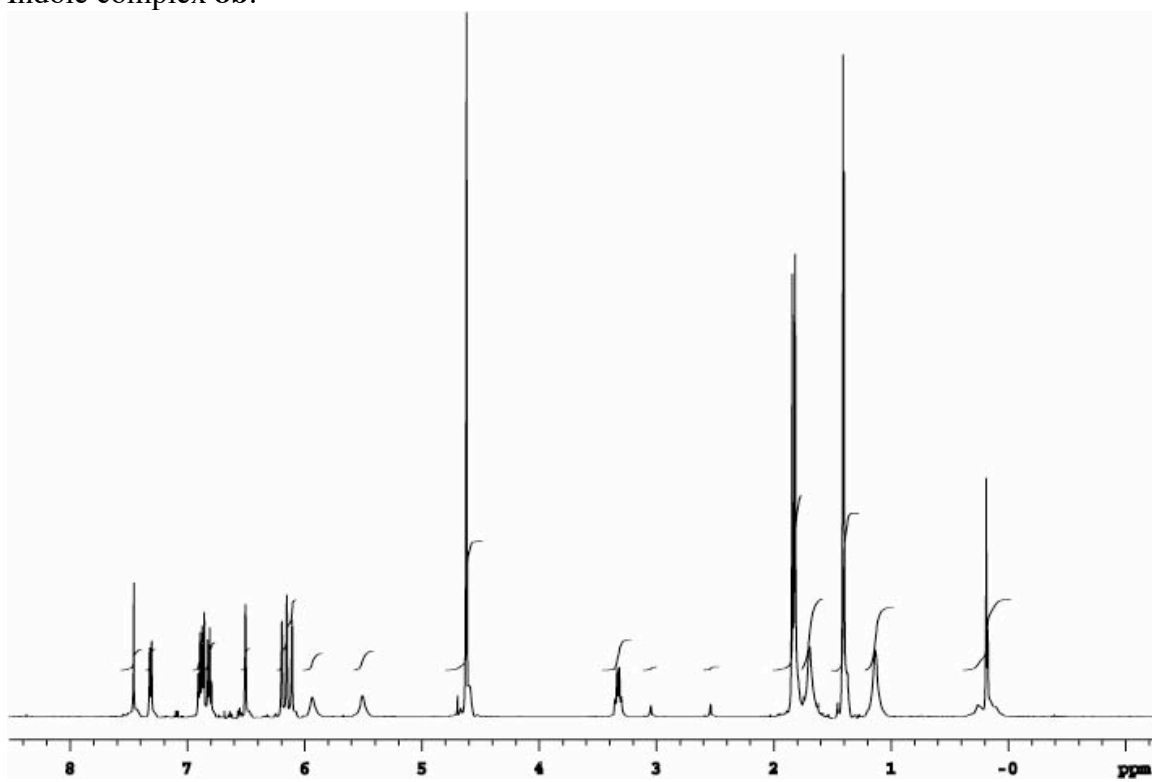

Indole complex **8c**: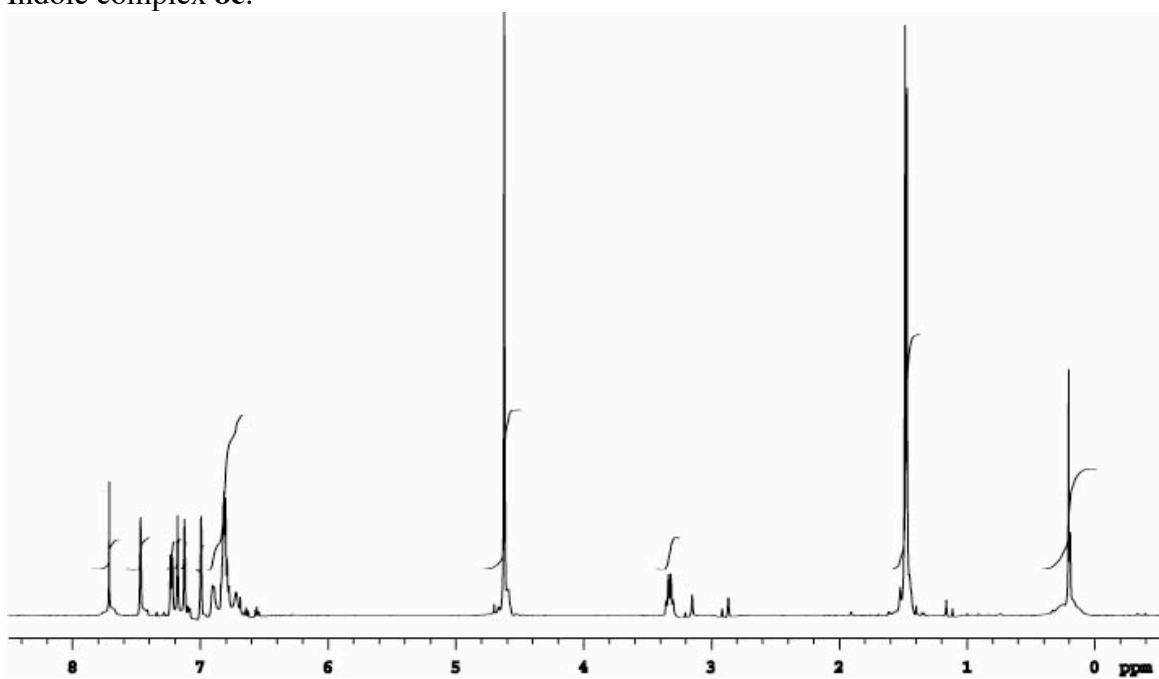2-Methylindole- $\pi$ -complex **9**: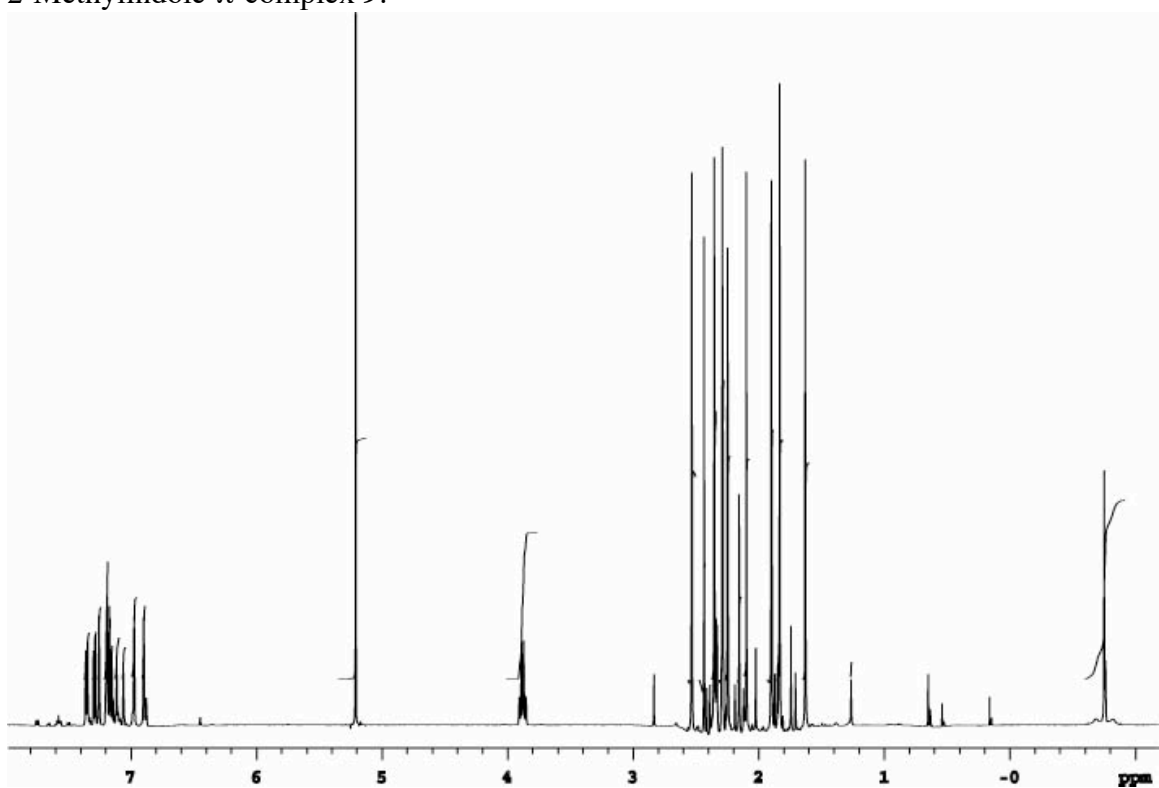

2-Methylindole-*N*-complex **10**: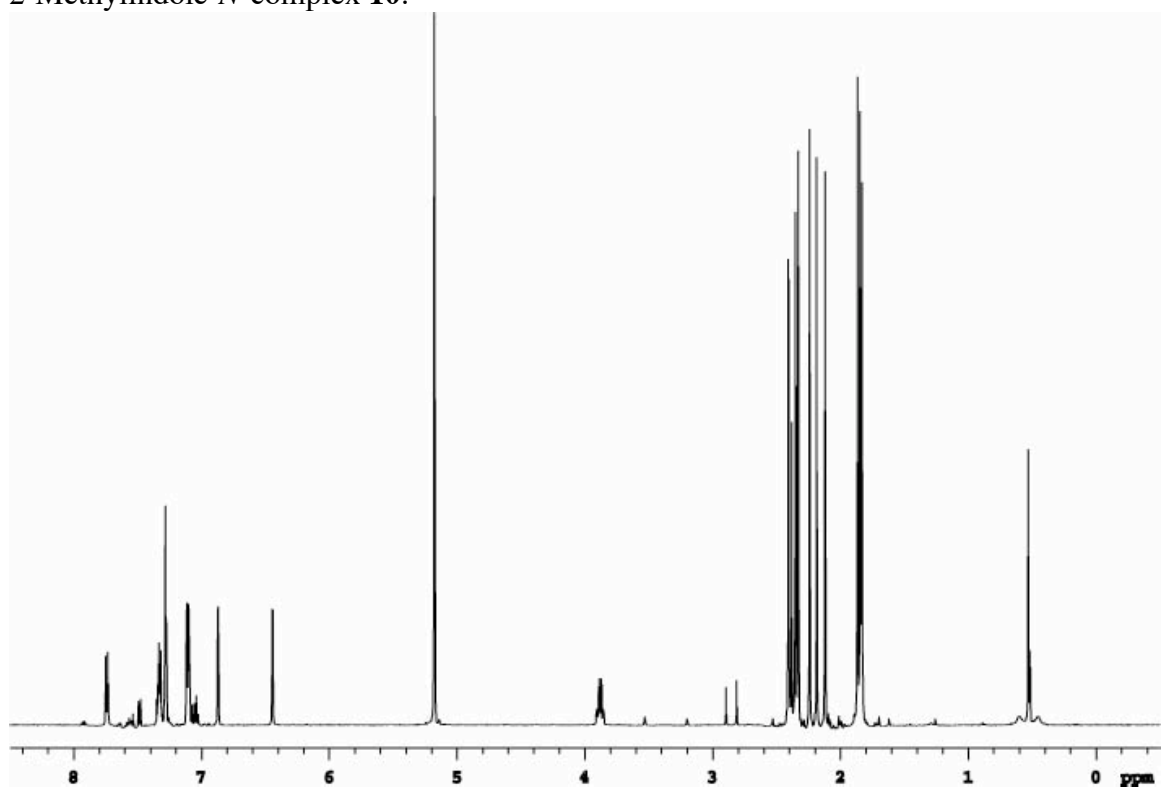1-Methylindole-  $\pi$  -complex **11**: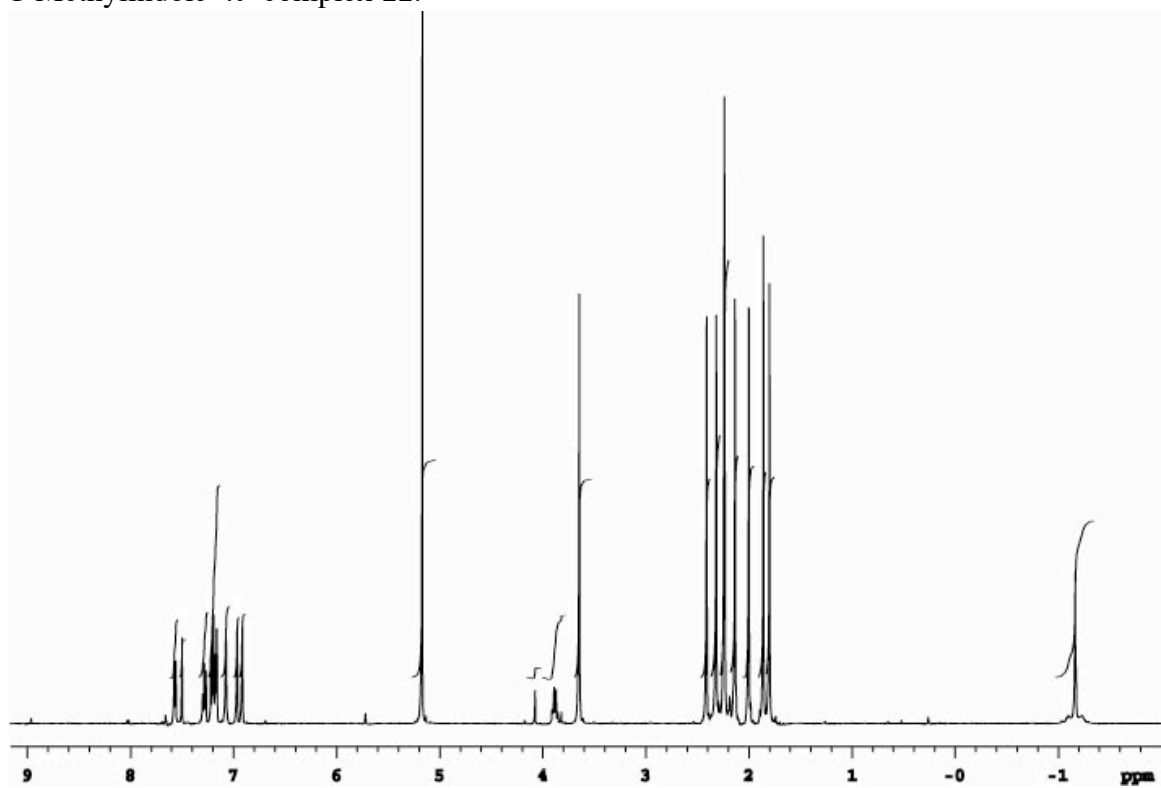



1-Methylindole-*N*-complex **12**:

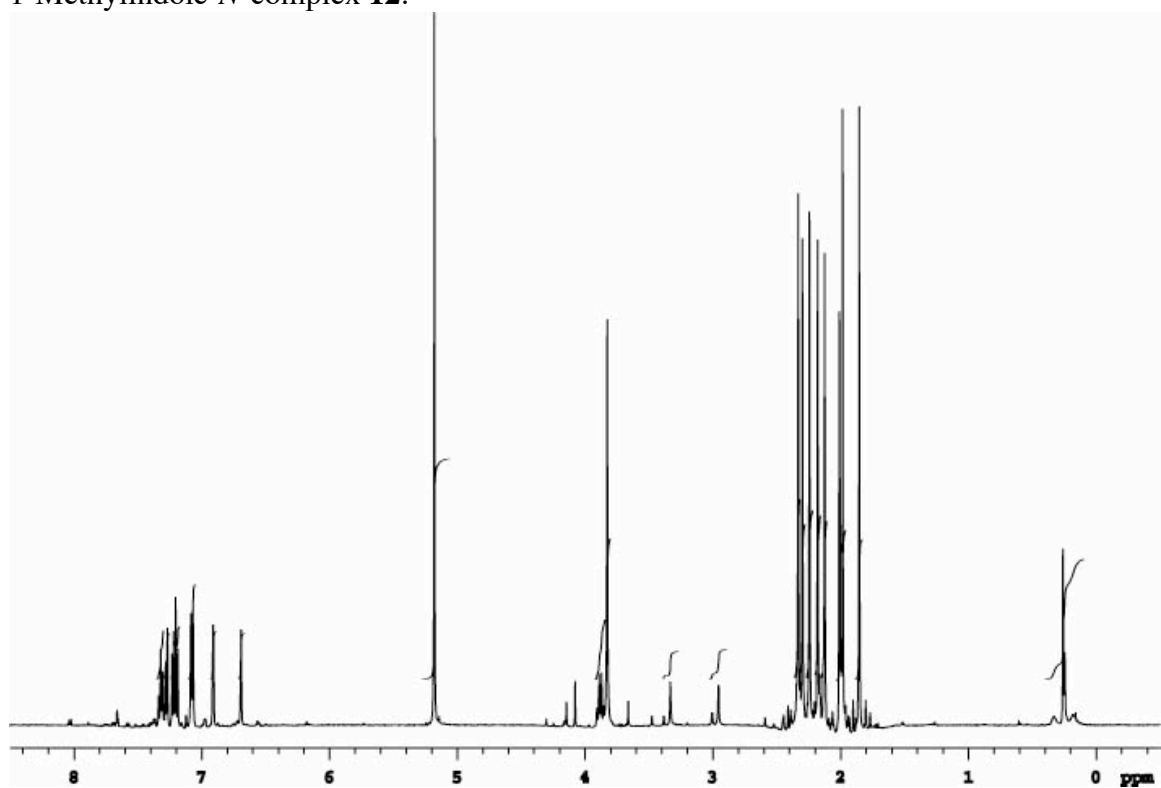

Supplement: Supplementary file 1 [file 4735903]
